# Supplementary material for: PMS1 as a target for splice modulation to prevent somatic CAG repeat expansion in Huntington’s disease
Source: PubMed Central journal article supplement — bioRxiv. 2023 Jul 27:2023.07.25.550489. Preprint. [Version 1] doi: 10.1101/2023.07.25.550489 (PMC10402039; doi:10.1101/2023.07.25.550489), 2023-07-27
Supplement: media-1.pdf [file media-1.pdf]

## Contents

|                                     |    |
|-------------------------------------|----|
| Supplementary Figure 1 .....        | 2  |
| Supplementary Figure 2.....         | 3  |
| Supplementary Figure 3.....         | 4  |
| Supplementary Figure 4.....         | 5  |
| Supplementary Figure 5.....         | 6  |
| Supplementary Figure 6.....         | 7  |
| Supplementary Figure 7.....         | 8  |
| Supplementary Figure 8.....         | 9  |
| Supplementary Figure 9.....         | 10 |
| Supplementary Figure 10.....        | 11 |
| Supplementary Figure 11 .....       | 12 |
| Supplementary Figure 12.....        | 13 |
| Supplementary Table 1: primers..... | 14 |
| Supplementary Table 2: sgRNAs.....  | 15 |

# Supplementary Figure 1

a

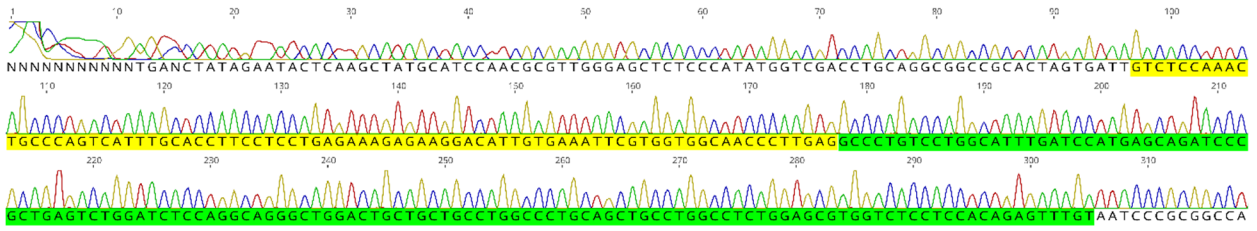

b

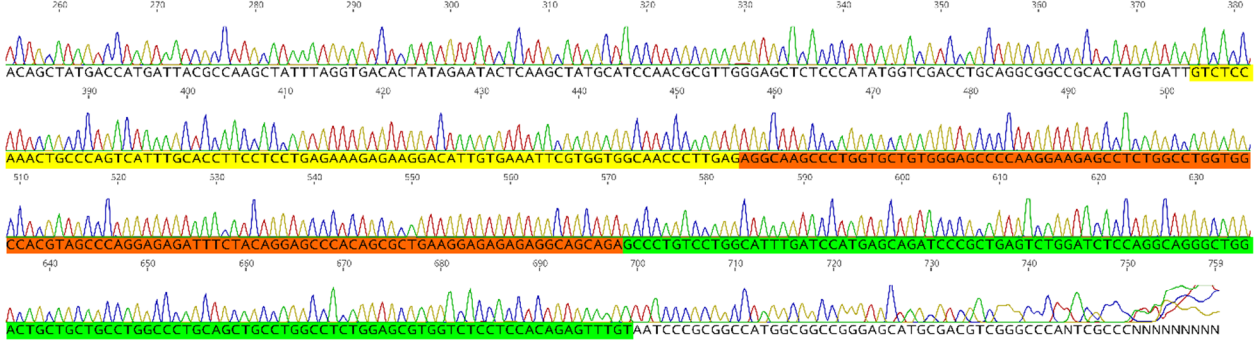

c

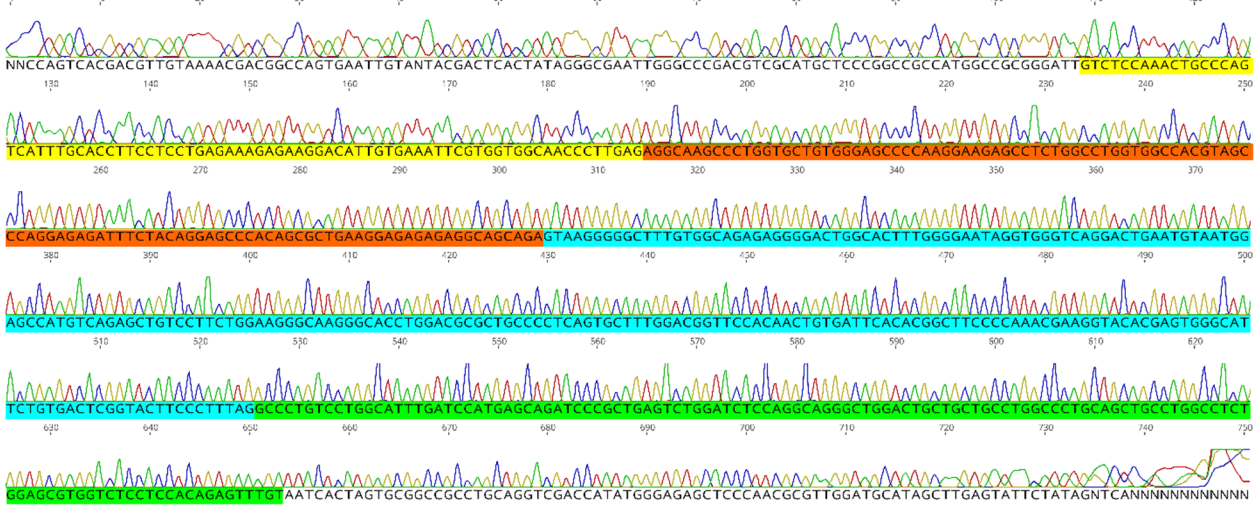

## Supplementary Figure 2

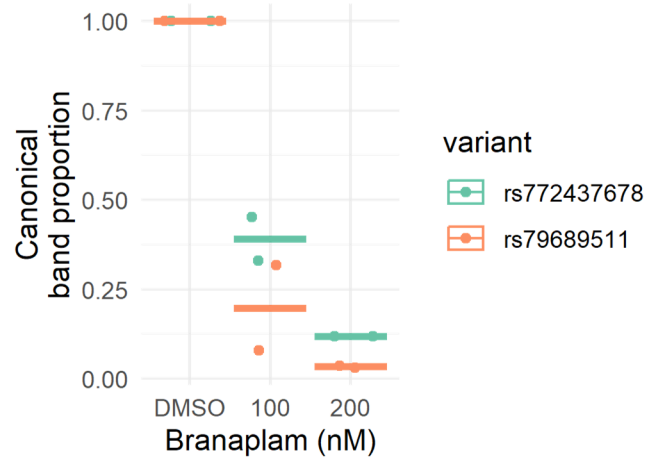

Supplementary Figure 3

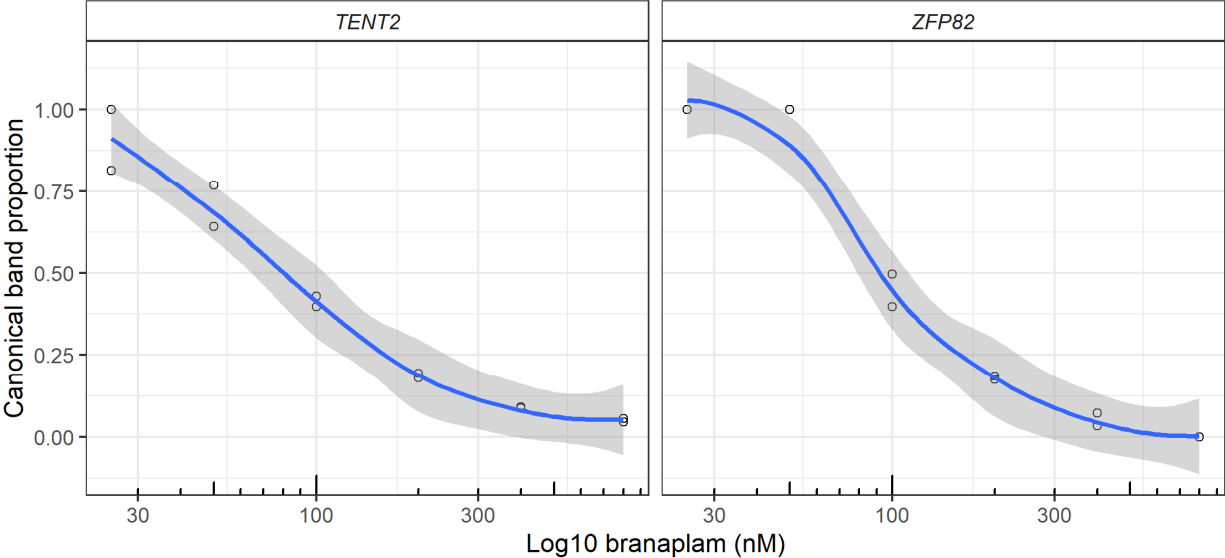

# Supplementary Figure 4

a

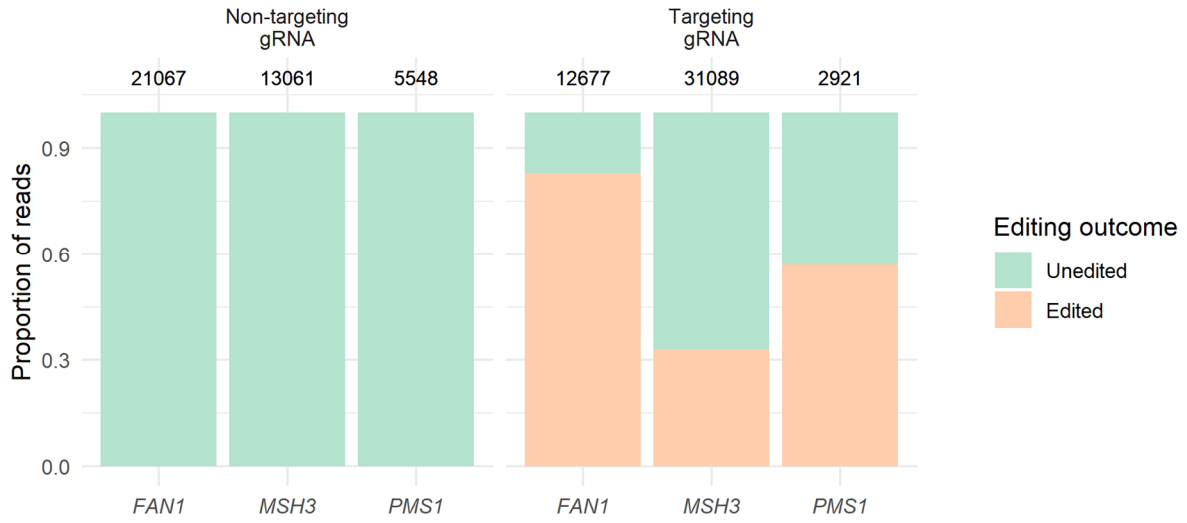

b

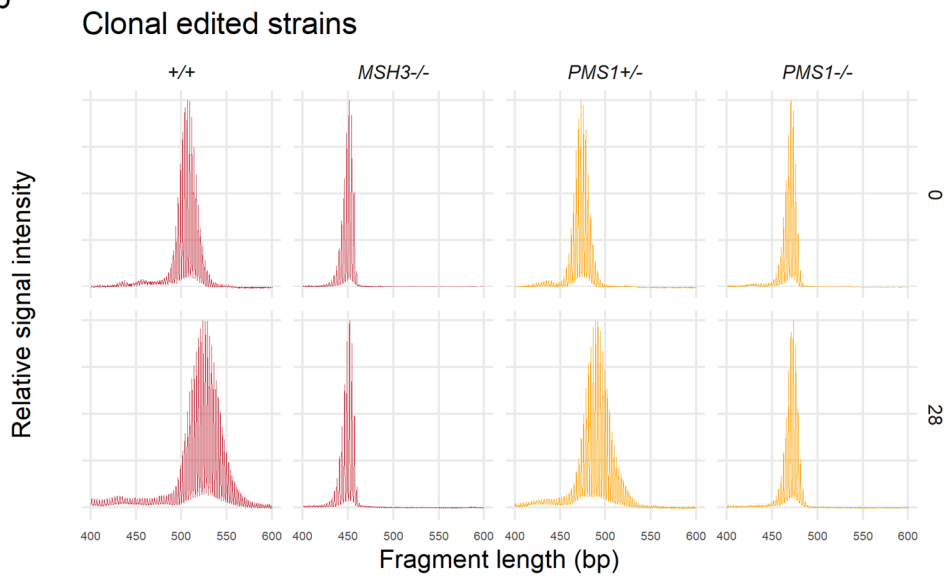

# Supplementary Figure 5

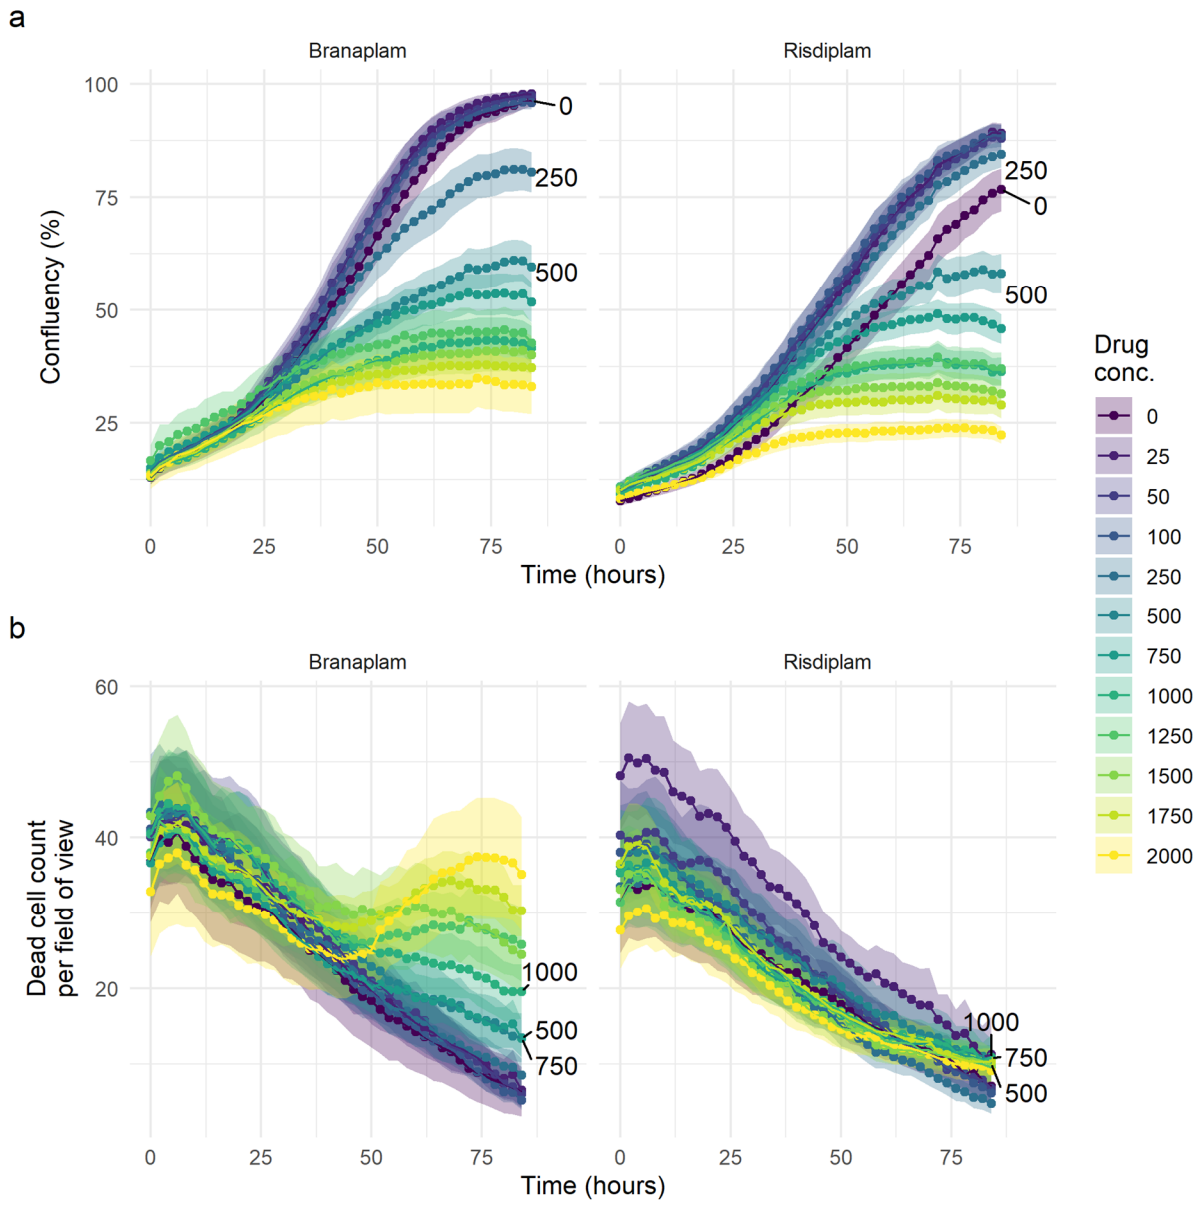

Supplementary Figure 6

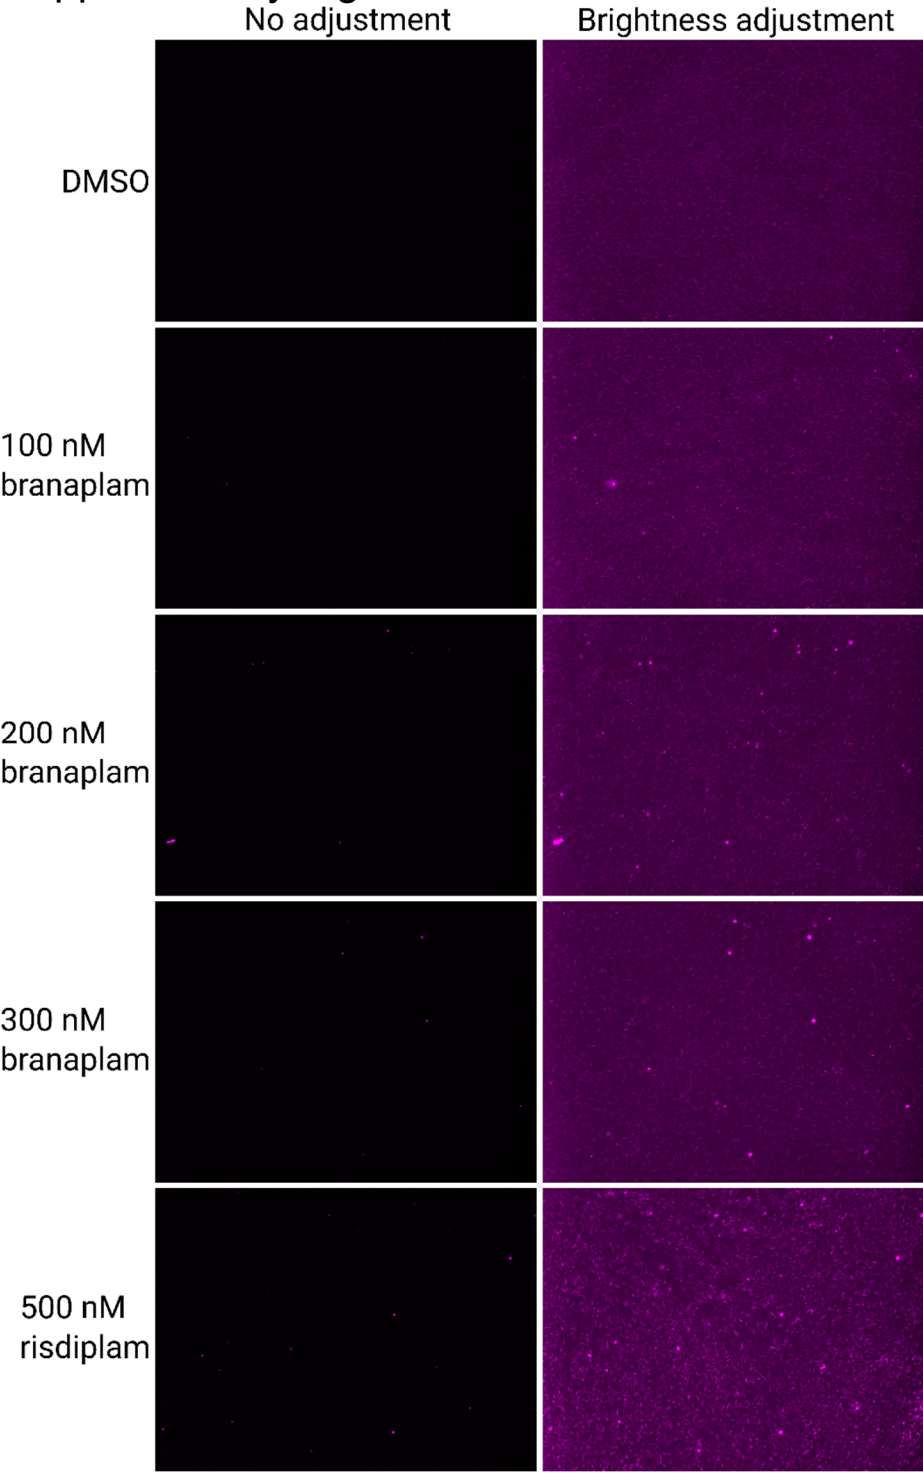

# Supplementary Figure 7

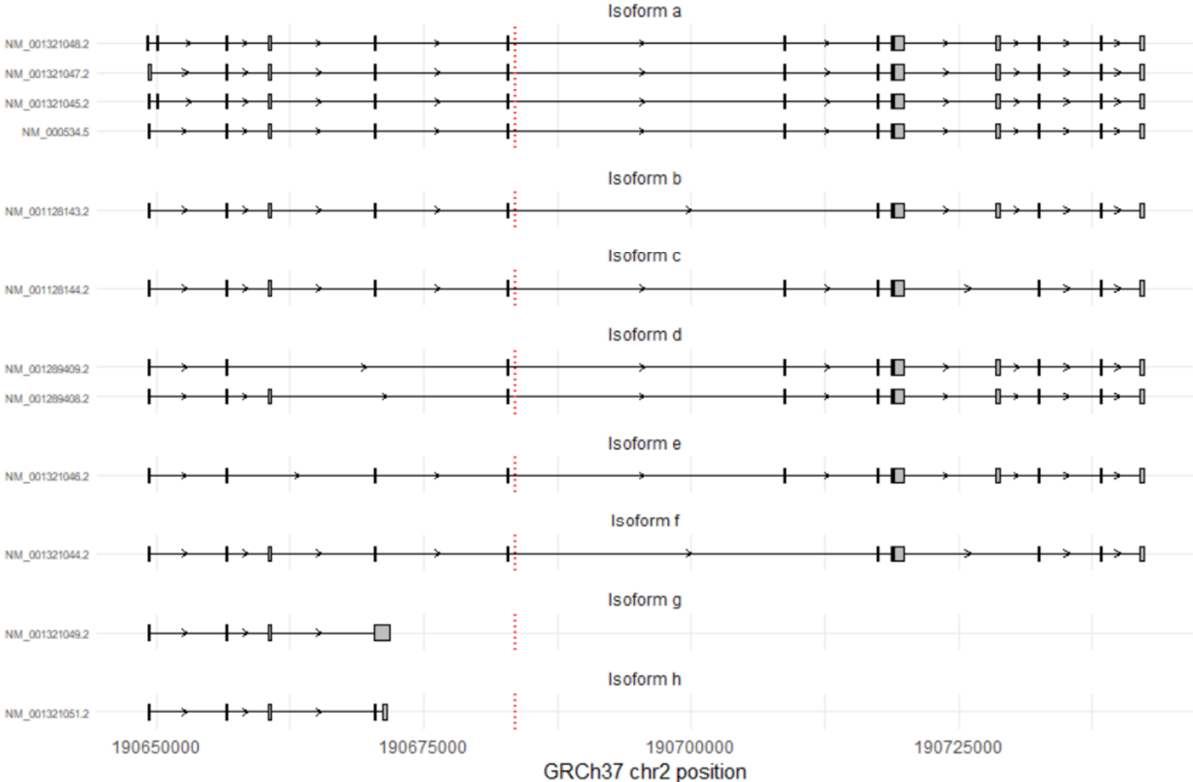



# Supplementary Figure 8

a

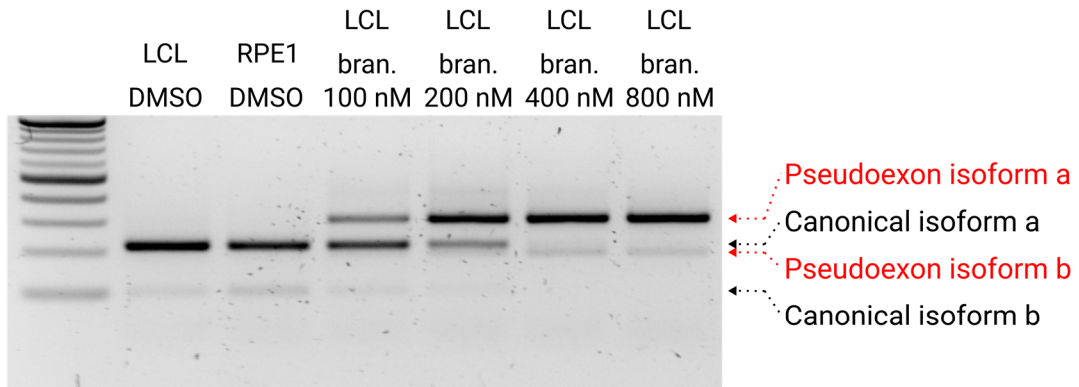

b

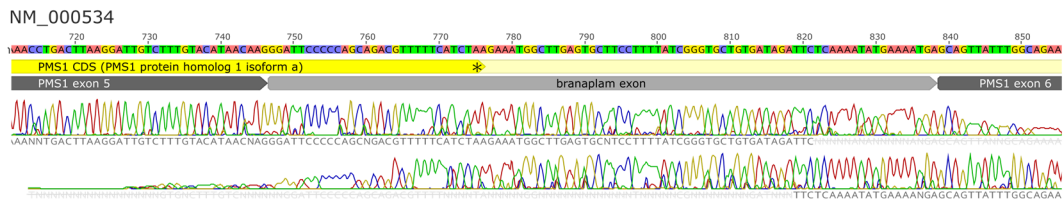

# Supplementary Figure 9

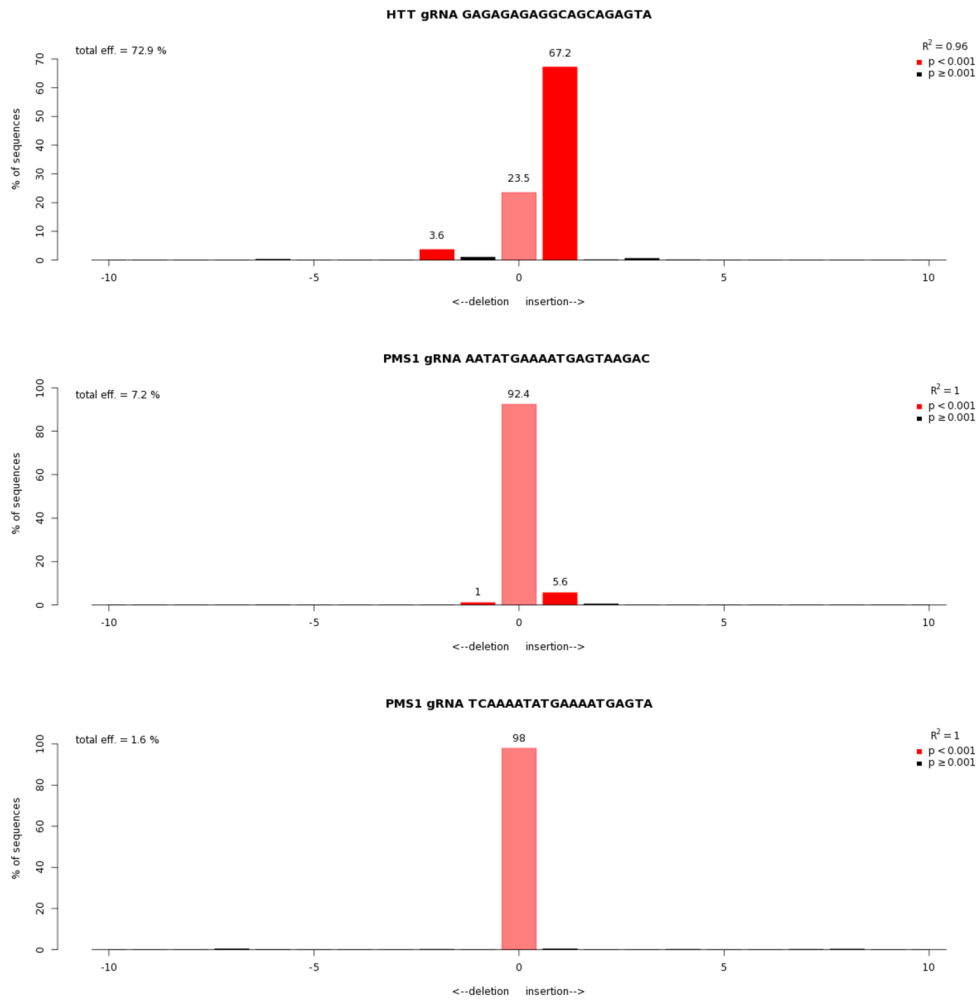

# Supplementary Figure 10

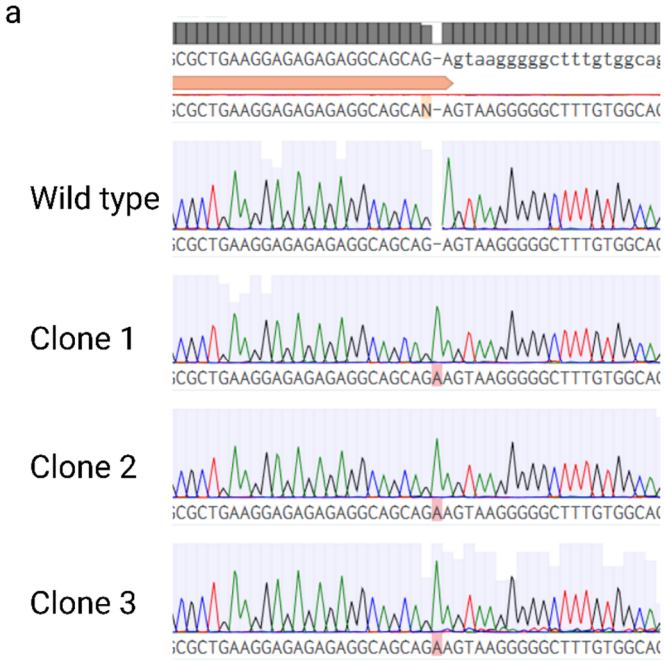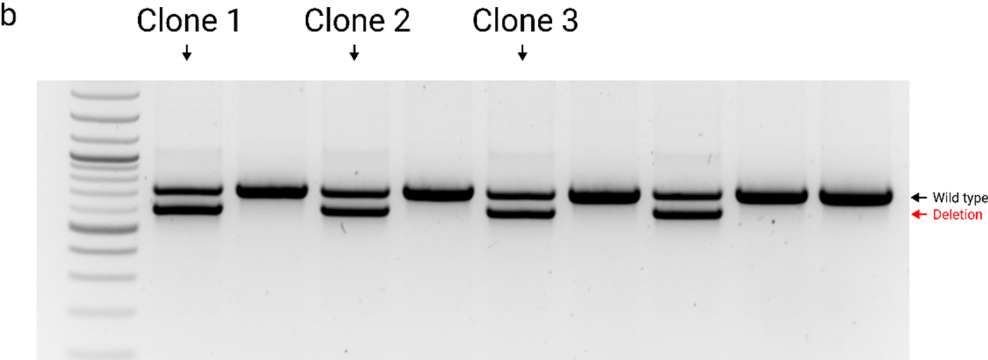

# Supplementary Figure 11

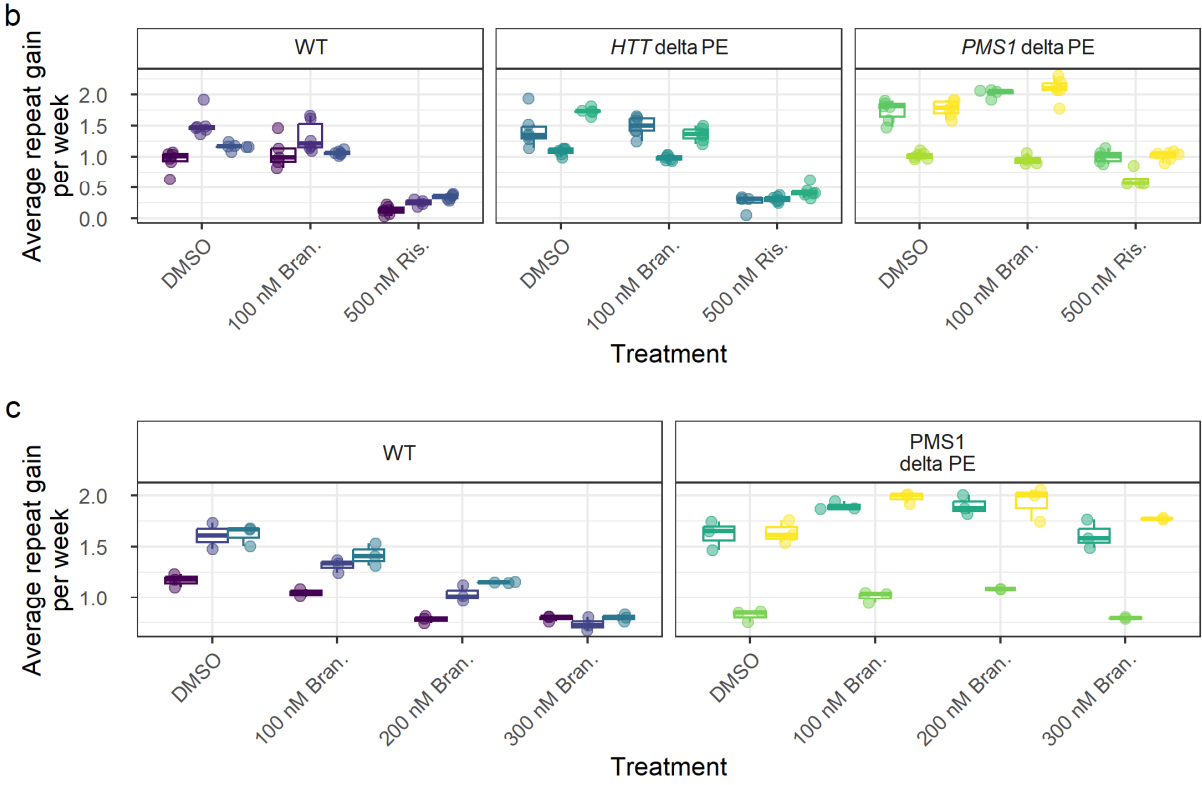



## Supplementary Table 1: primers

| Name                                          | sequence                                                         |
|-----------------------------------------------|------------------------------------------------------------------|
| <i>HTT</i> exon 49 F                          | GTCTCCAAACTGCCAGTCAT                                             |
| <i>HTT</i> exon 50 R                          | ACAAACTCTGTGGAGGAGACC                                            |
| <i>HTT</i> exon 49-50 probe                   | /56-FAM/AACCCTTGAG/ZEN/GCCCTGCCT/3IABkFQ/                        |
| <i>SDHA</i> F                                 | TTTGATGCAGTGGTGGTAGG                                             |
| <i>SDHA</i> R                                 | CAGAGCAGCATTGATTCCTC                                             |
| <i>SDHA</i> probe                             | /56-FAM/AG CCT AAG A/ZEN/T GAG AGT TCA AGT TGA GTT TGG /3IABkFQ/ |
| <i>HTT</i> exon 49 cloning F                  | ACCATGGGGGATGCTGCACTGTATCAG                                      |
| <i>HTT</i> exon 49 cloning R                  | GGCCTCCAGGATGAAGTG                                               |
| Minigene SDM -1G>C F                          | GGCAACCCTTGACgtaagaggcagctcgggag                                 |
| Minigene SDM -1G>C R                          | gctgcctcttacGTCAAGGGTTGCCACCAC                                   |
| Minigene SDM -1G>A F                          | GGCAACCCTTGAAgtaagaggcagctcgggag                                 |
| Minigene SDM -1G>A R                          | gctgcctcttacTTCAAGGGTTGCCACCAC                                   |
| Minigene SDM -1G>T F                          | GGCAACCCTTGATgtaagaggcagctcgggag                                 |
| Minigene SDM -1G>T R                          | gctgcctcttacATCAAGGGTTGCCACCAC                                   |
| <i>HTT</i> exon 1 cloning primers with Sall F | CATGTACGgtcgacaccgccATGGCGACCCTGGAAAAGCTG                        |
| <i>HTT</i> exon 1 cloning primers with Sall R | CATGTACGgtcgacTCGGTGCAGCGGCTCCTC                                 |
| AAVS1 5' homology arm F                       | CTGCCGTCTCTCCTGAGT                                               |
| AAVS1 5' homology arm R                       | GTGGGCTTGTACTCGGTCAT                                             |
| CAG repeat sizing 1st PCR F (CAG1)            | ATGAAGGCCTTCGAGTCCCTCAAGTCCTTC                                   |
| CAG repeat sizing 1st PCR R (EGFP R)          | GTCCAGCTCGACCAGGATG                                              |
| CAG repeat sizing 1st PCR F (CAG1)            | /56-FAM/ATGAAGGCCTTCGAGTCCCTCAAGTCCTTC                           |
| CAG repeat sizing 1st PCR R (Hu3)             | GGCGGCTGAGGAAGCTGAGGA                                            |
| <i>FAN1</i> KO NGS F                          | AGTGTTGAAAACGTGAGGCA                                             |
| <i>FAN1</i> KO NGS R                          | CCATTGCAGCTTGACCCCTGCT                                           |
| <i>MSH3</i> KO NGS F                          | ATGCCCGGCTTGATGCTGTATCG                                          |
| <i>MSH3</i> KO NGS R                          | AGTGCCTCAAGCTGAAGAACACTGT                                        |
| <i>PMS1</i> KO NGS F                          | GCTGAGGATGAATGCAAAATATAGGA                                       |
| <i>PMS1</i> KO NGS R                          | TCAGAGTGGTACTGAAAGGATTCCA                                        |
| <i>PMS1</i> exon5 F                           | TCTCCTCATGAGCTTTGGTATCC                                          |
| <i>PMS1</i> exon6 R                           | ACAGCAGTCCCAGAACTGA                                              |
| <i>PMS1</i> ex5-6 probe                       | /56-FAM/TG TAC ATA A/ZEN/C AAG GCA GTT ATT TGG CAG A/3IABkFQ/    |
| <i>PMS1</i> exon7 R                           | TGGTCTGCATCACACTTTGGA                                            |
| <i>PMS1</i> int 5 F                           | AGGCACCACCTATGAACCAG                                             |
| <i>PMS1</i> int 5 R                           | AGCAACAAGGATGGAAATGG                                             |

## Supplementary Table 2: sgRNAs

| Target                              | sgRNA seq            | PAM |
|-------------------------------------|----------------------|-----|
| <i>FAN1</i>                         | TGCATGGAGTAACATCCAAG | NGG |
| <i>MSH3</i>                         | AAATTGCCCGACATAGAGAG | NGG |
| <i>PMS1</i>                         | CAGAGTATCAGATCACAAGA | NGG |
| <i>HTT</i> pseudoexon 1             | GAGAGAGAGGCAGCAGAGTA | NGG |
| <i>PMS1</i> pseudoexon 1            | AATATGAAAATGAGTAAGAC | NGG |
| <i>PMS1</i> pseudoexon 2            | TCAAAATATGAAAATGAGTA | NGA |
| <i>PMS1</i> pseudoexon flanking LHS | TTAGATGAAAAACGTCTGCT | NGG |
| <i>PMS1</i> pseudoexon flanking RHS | CAAAGAATCAACAGTGTAGA | NGG |
